# Supplementary material
Source: Elsevier journal article supplement (https://www.sciencedirect.com/science/article/pii/S2254887422001011)
Supplement: mmc1 [file S2254887422001011:mmc1.pdf]

## Appendix 1. Variables included in the survey conducted by La Princesa University Hospital Healthcare Ethics Committee (2021 version)

### 1. DEMOGRAPHIC DATA

- Do you identify as: Male / Female / Other
- How old are you? .....
- What is your profession at La Princesa University Hospital?
  - Medicine (regardless of category)
  - Resident physician
  - Social work
  - Nursing staff
  - Physical therapy
  - Nursing technician/assistant
  - Not care-related
  - Administrative staff
  - Other staff (specify).....

### 2. ABOUT THE HEC

- Did you know that the La Princesa Univ. Hospital has a **Healthcare Ethics Committee (HEC)**?
  - Yes
  - No
- What do you think is the function of the HEC? (*You may mark more than one*)
  - Advisory and guidance
  - Education
  - Sanctioning authority
- Have you ever used the HEC?
  - Yes
  - No, but I've thought about it
  - No, I've never considered it
- If you answered no, what factors do you think influenced you? (*You may select more than one answer*)
  - I haven't needed it
  - Lack of knowledge about the process
  - I couldn't wait for the deliberation/resolution to make a decision
  - I wasn't sure whether the issue was truly an ethical conflict
  - Involvement of other professionals
  - I was not responsible for the case
- If you answered yes, did you find it useful?
  - Yes
  - No

- Did you know that the HEC has offered a **Clinical Ethics Consultation (CEC) service** at La Princesa Univ. Hospital since last year?
  - o Yes
  - o No
- What do you think is the function of the CEC?
  - o Advisory and guidance
  - o Education
  - o Sanctioning authority
- Have you ever used the CEC service?
  - o Yes
  - o No, but I've thought about it
  - o No, I've never considered it
- If you answered no, what factors do you think influenced you? (*You may select more than one answer*)
  - o I haven't needed it
  - o Lack of knowledge about the process
  - o I couldn't wait for the deliberation/resolution to make a decision
  - o I wasn't sure whether the issue was truly an ethical conflict
  - o Involvement of other professionals
  - o I was not responsible for the case
- If you answered yes, did you find the cross-consultation useful?
  - o Yes, to resolve the case
  - o Yes, to increase my knowledge about a specific ethical issue
  - o Yes, to learn how to approach an ethical issue in a structured manner
  - o No, it was not useful
- Would you request another cross-consultation with the CEC for future ethical conflicts?
  - o Yes
  - o No
- Do you think a cross-consultation service like the CEC should be available 24/7 (24 hours a day, every day of the week)?
  - o Yes
  - o No
- What other aspects of the clinical ethics cross-consultation process would you like to improve? (*Open response*)

### **3. ABOUT HEALTH CARE ETHICS PROBLEMS:**

- Do you face ethical issues during your daily practice?
  - o Frequently
  - o Occasionally
  - o Never

- If you answered yes, what are those problems regarding? (*You may select more than one answer*)
  - Limitation of therapeutic effort
  - Patient communication
  - Communication with family members
  - Communication with other professionals
  - Confidentiality – privacy
  - Treatment refusal
  - Difficulty interpreting advance directives
  - Problems related to the informed consent process
  - Competition during decision-making
  - Difficulty making decisions with family members/representatives
  - Difficulty identifying values/preferences that are most important to the patient
  - Decision-making in situations with limited resources
  - Problems related to mechanical restraints
  - Patients without representation
  
- If you haven't requested formal consultation from the CEC service, how did you resolve the conflict?
  - I have sufficient criteria
  - Consultation with other colleagues
  - As best I could
  
- Do you think your perception about potential ethical conflicts has changed over the course of 2020 as a result of the COVID-19 pandemic?
  - Yes
  - No
  
- If you answered yes, how so?
  - I am more aware of ethical issues in my daily practice
  - I have gained awareness about the need to request assistance for resolving ethical issues
  - I have realised I need to improve my own specific training in clinical ethics
  - I have expanded my training in clinical ethics
  - Other
  
- Which of the following ethical issues do you think were particularly relevant during the COVID-19 pandemic (if you have dealt with them)? (*You may select more than one answer*)
  - Limitation of therapeutic effort
  - Patient communication
  - Communication with family members
  - Communication with other professionals
  - Confidentiality – privacy
  - Treatment refusal
  - Difficulty interpreting advance directives
  - Problems related to the informed consent process

- Competition during decision-making
- Difficulty making decisions with family members/representatives
- Difficulty identifying values/preferences that are most important to the patient
- Decision-making in situations with limited resources
- Problems related to mechanical restraints
- Patients without representation

#### **4. REGARDING BIOETHICS TRAINING:**

- As of now, how would you define your bioethics knowledge and abilities?
  - Extensive
  - Sufficient for my daily practice
  - Scarce
- Do you think that bioethics training is:
  - Essential
  - Necessary
  - Useful
  - Not necessary
- Of the following statements, which do you think best describes your relationship with bioethics? (*List according to relevance, from 1 [most relevant] to 4 [least relevant]*)
  - It offers or provides me with a useful work methodology for addressing ethical issues in health care practice.
  - It can help me navigate or avoid legal problems related to clinical decisions.
  - Its mission is to protect patients and their family members from potential mistakes by the National Healthcare System.
  - It is an important discipline with dedicated health professionals who help resolve troublesome issues in the health care setting.
- Are you interested in improving your training in bioethics? (*List according to relevance, from 1 [most relevant] to 4 [least relevant]*)
  - Yes, and I would be willing to find time to dedicate to training courses or programs.
  - Yes, however it isn't one of my priorities at this time.
  - No, I think there is plenty to do and learn on other topics first.
  - I'd never given any thought to this question.

#### **5. PLEASE WRITE DOWN ANY SUGGESTIONS OR PROPOSALS:**

- In my specialisation, area of work, team or unit, I think it is urgent/necessary to address the following issues from an ethical point of view: (*Open response*)
- I think the relationship between hospital professionals and the HEC could be improved by ... (*Open response*)
